# Supplementary material for: Nanotechnology in action: silver nanoparticles for improved eco-friendly remediation
Source: PeerJ journal article supplement (doi:10.7717/peerj.18191), 2024-10-03

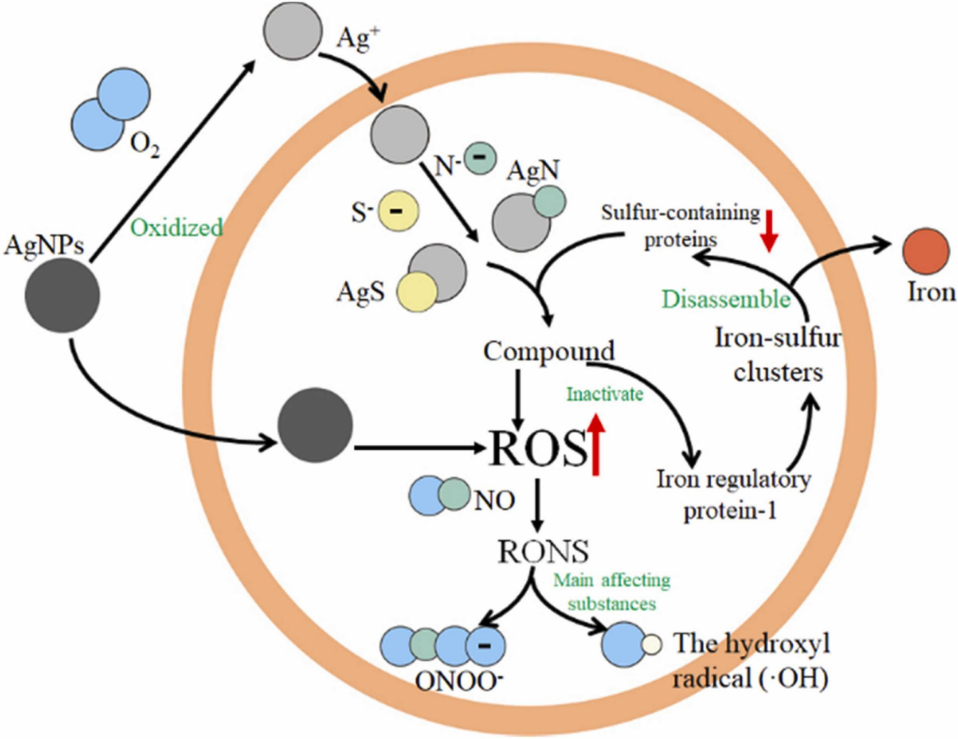

Supplement: Figure_S3.pdf [file Figure_S3.pdf]
