# Supplementary material for: Nanotechnology in action: silver nanoparticles for improved eco-friendly remediation
Source: PeerJ journal article supplement (doi:10.7717/peerj.18191), 2024-10-03
Supplement: FigureS1.pdf [file FigureS1.pdf]

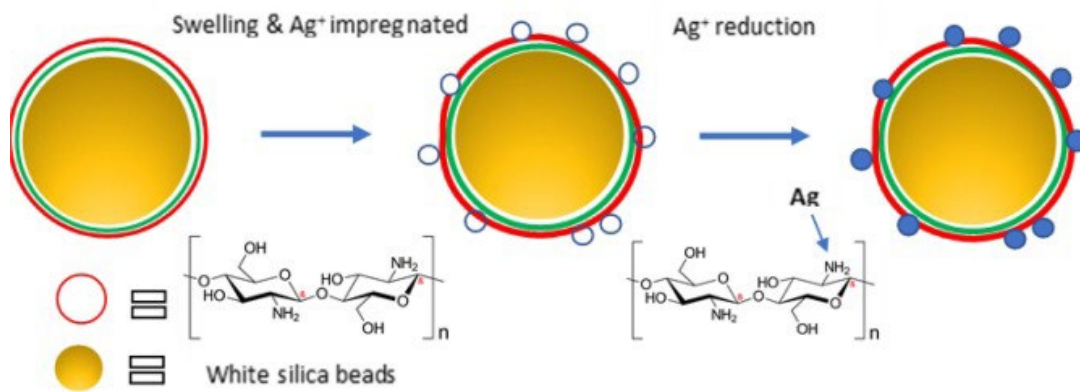

(a)

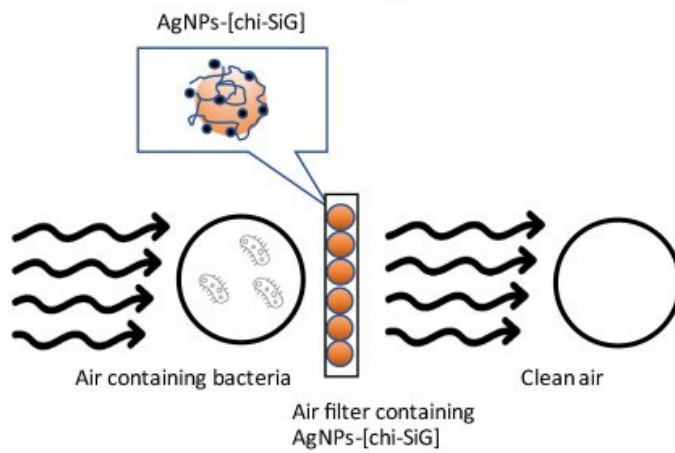

(b)

**Figure 4.** Preparation and antibacterial action of AgNPs. Reprinted with permission from (Hidayat et al. 2022). Copyright (2022), Elsevier
