# Supplementary material for: Nanotechnology in action: silver nanoparticles for improved eco-friendly remediation
Source: PeerJ journal article supplement (doi:10.7717/peerj.18191), 2024-10-03
Supplement: FigureS2.pdf [file FigureS2.pdf]

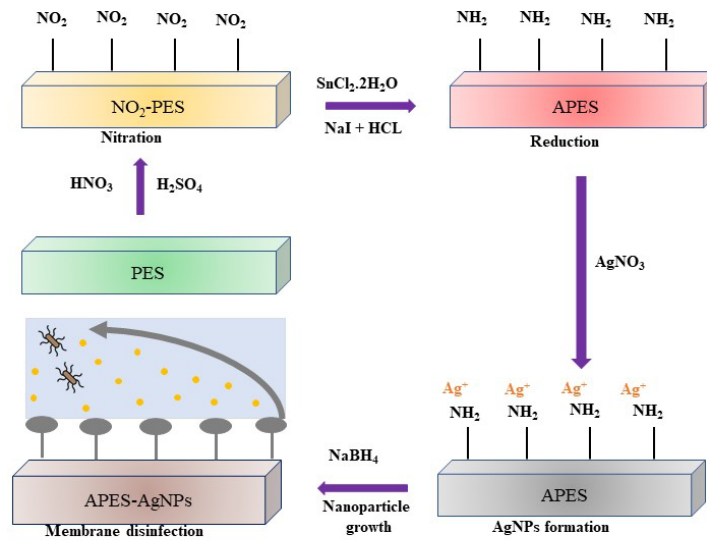

**Figure 5.** Preparation of aminated polyether sulfone decorated by AgNPs.
